# Supplementary material
Source: PubMed Central journal article supplement (PMC4012473)
Supplement: 411e9cfd17132aac241e3b3dd024e7d3_genetics.113.159780-5.pdf [file 411e9cfd17132aac241e3b3dd024e7d3_genetics.113.159780-5.pdf]

**Table S1 dsRNAs targeting the 76 nt sequence of collagen genes elicit the superdumpy phenotype in *eri-1(mg366)* animals.** L1 animals of *eri-1(mg366)* mutants were fed with dsRNAs and the phenotypes were scored 3 days later. +++, superdumpy; -, no dumpy.

| <i>RNAi (76mer)</i> | <i>superdumpy</i> |
|---------------------|-------------------|
| <i>no RNAi</i>      | -                 |
| <i>dpy-13</i>       | ++++              |
| <i>sqt-3</i>        | ++++              |
| <i>col-93a</i>      | ++++              |
| <i>col-93c</i>      | ++++              |
| <i>col-43</i>       | ++++              |
| <i>col-94</i>       | ++++              |
| <i>col-122</i>      | ++                |
| <i>col-179</i>      | -                 |

**Tables S2-S7**

Available for download as Excel files at <http://www.genetics.org/lookup/suppl/doi:10.1534/genetics.113.159780/-/DC1>

**Table S2** The number of reads of NRDE-3-associated siRNAs targeting collagen genes.

**Table S3** Candidate-based RNAi screening to search for genes by which the silencing were strongly depended on *nrde* pathway. 168 genes present in operons were selected from the Ahringer RNAi library with reported phenotype in either N2 or *rrf-3* strain. The 168 operon genes are unlikely to be repetitive based on the criteria of >90% nt identity in a stretch of >200 nt sequence to one or more of the other genes or genomic loci. 28 RNAi clones targeting multi-gene families were selected from the Ahringer RNAi library. NRDE-dependent silencing was observed when feeding animals with dsRNA targeting of histones, homeobox genes, and GPCR.

**Table S4** Off-target gene silencing preferentially requires the *Nrde* pathway. *eri-1(mg366);MAGO12* was crossed with *eri-1(mg366)*. Eight independent F2 animals were selected that suppressed the *dpy-13* RNAi-induced superdumpy. The F2 suppressors were then genotyped for the twelve Argonaute genes. *nrde-3(tm1116)*, but not other eleven *wago* alleles, is linked to superdumpy suppression.

**Table S5** Deep sequencing identified 178 NRDE-3 targets that exhibit at least ten raw reads and two fold enrichment between *FLAG::GFP::NRDE-3* and *eri-1(mg366);dpy-13(e458);FLAG::GFP::NRDE-3;(dpy-13 RNAi)* strains.

**Table S6** Sixty-three genomic loci were identified to display most NRDE-associated siRNA reads. Most of these loci are homologous in sequence to another region in the genome.

**Table S7** The primers used for quantitative real time PCR analysis.
